# Supplementary material for: A Majority of Human Melanoma Cell Lines Exhibits an S Phase-Specific Defect in Excision of UV-Induced DNA Photoproducts
Source: PubMed Central journal article supplement (PMC3885708; doi:10.1371/journal.pone.0085294), 2014-01-08
Supplement: pone.0085294.s001.pdf [file pone.0085294.s001.pdf]

6h post-BrdU

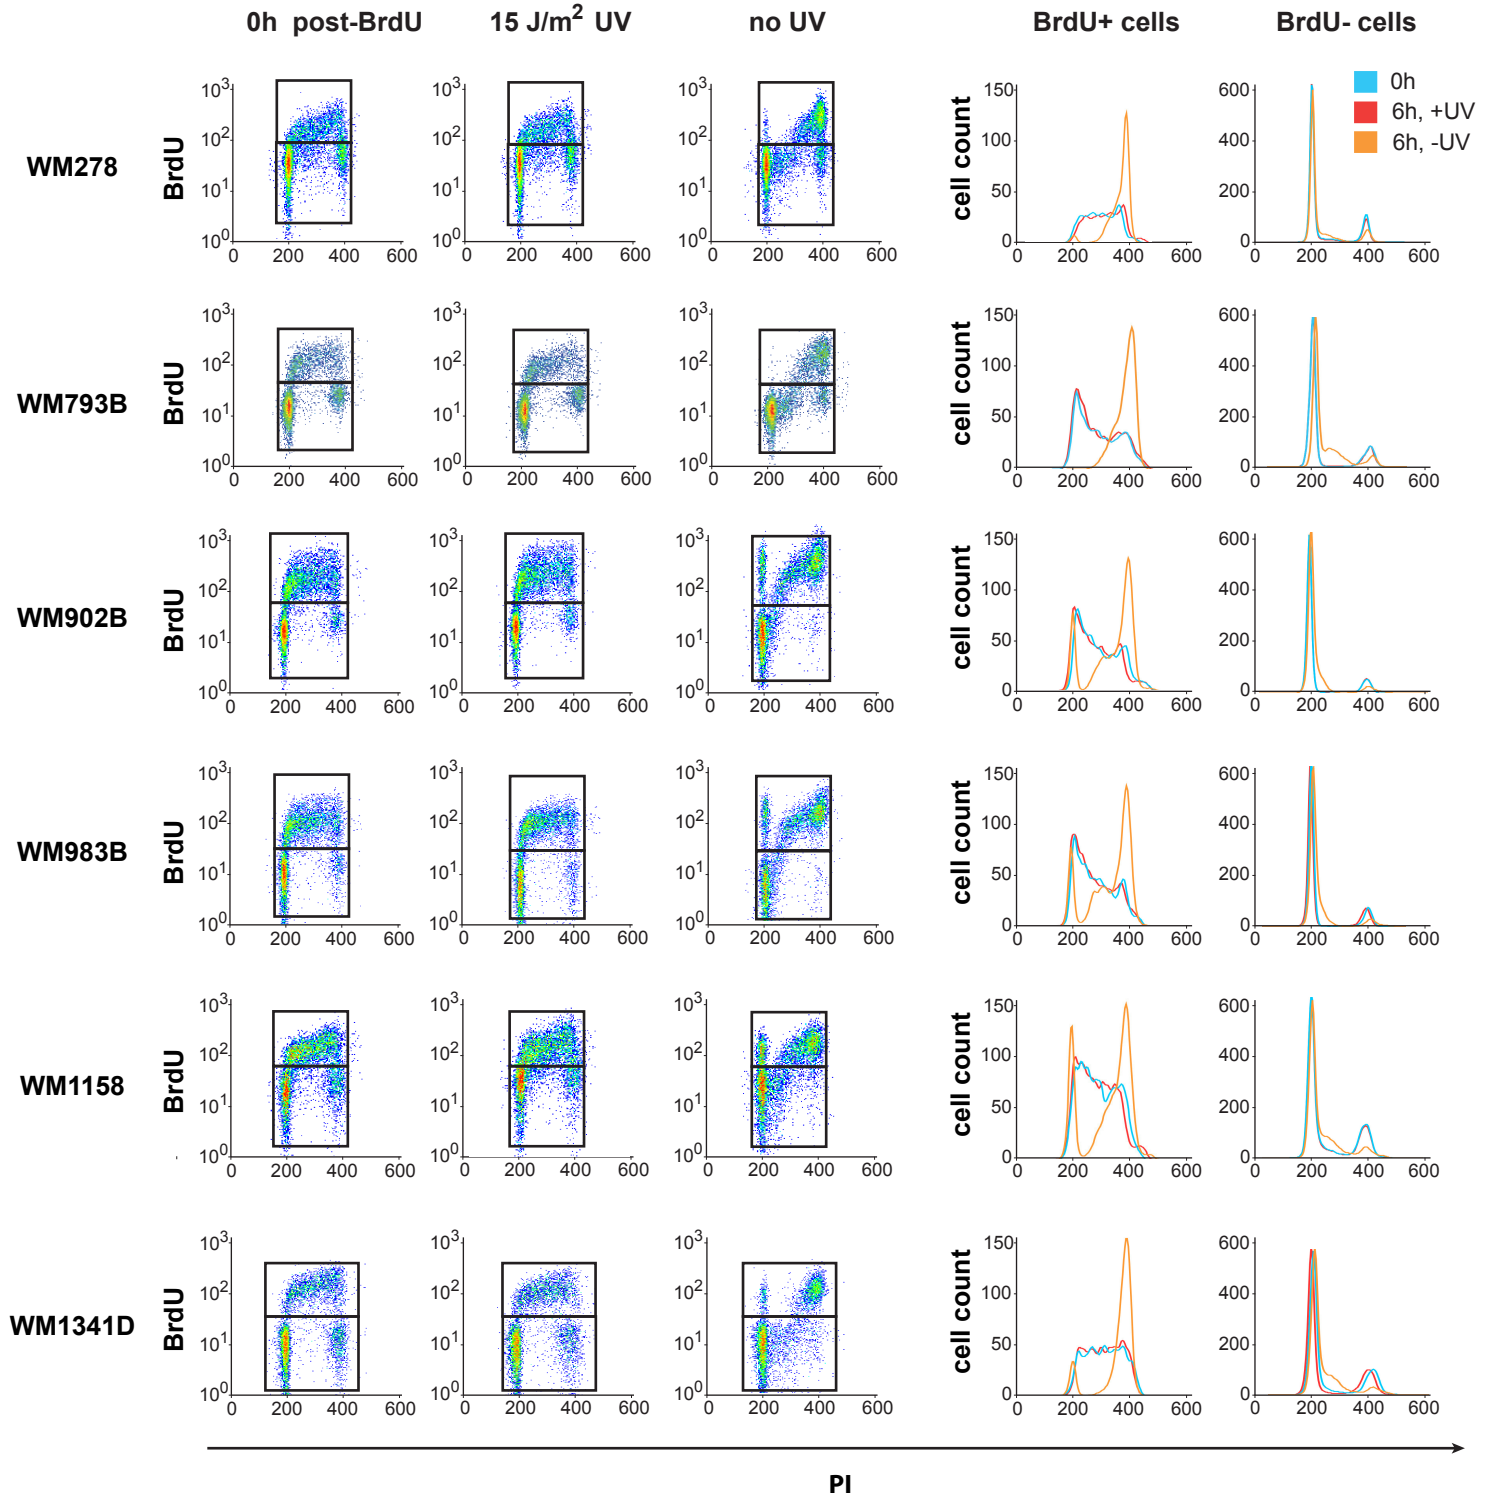

Figure S1

6h post-BrdU

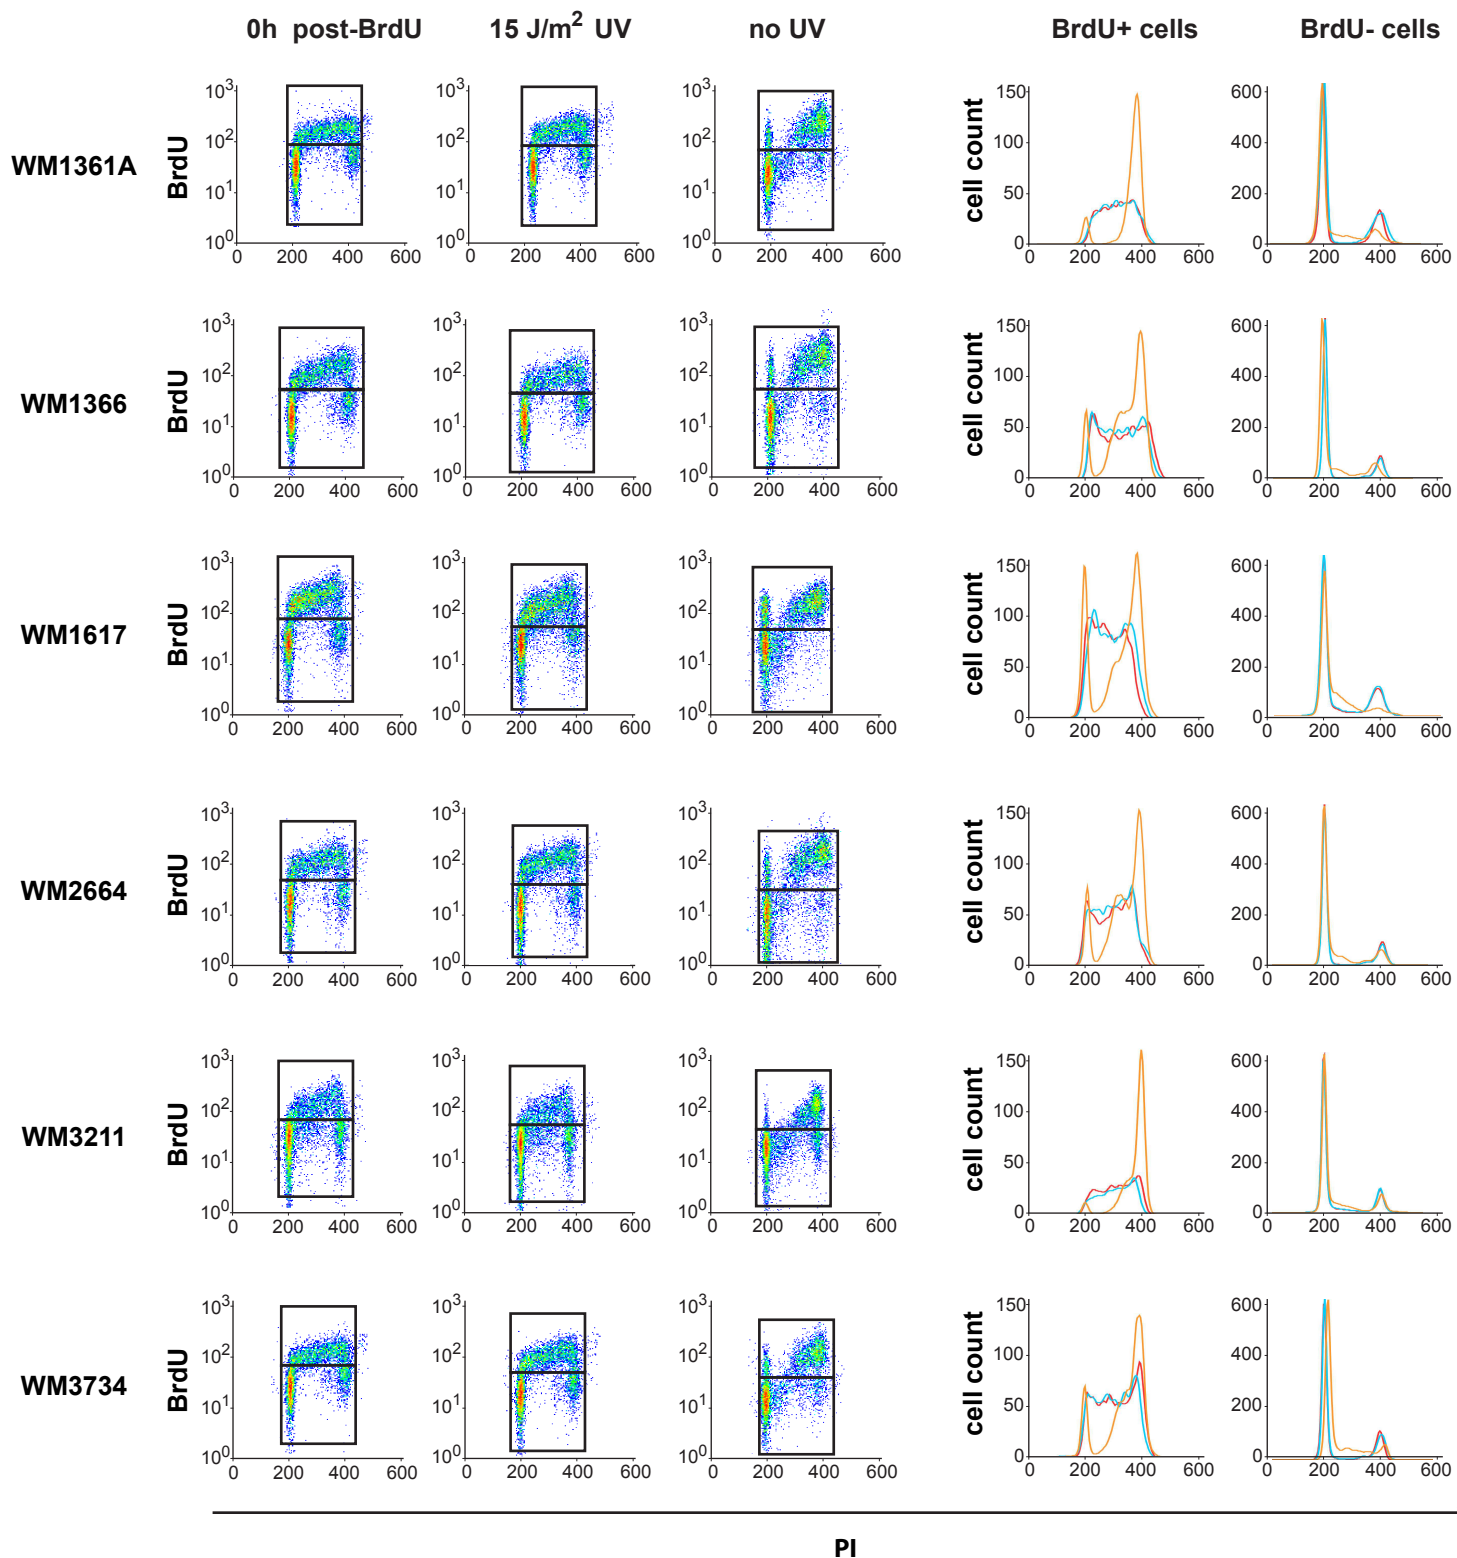

Figure S1 (continued)
