# Supplementary material for: A Majority of Human Melanoma Cell Lines Exhibits an S Phase-Specific Defect in Excision of UV-Induced DNA Photoproducts
Source: PubMed Central journal article supplement (PMC3885708; doi:10.1371/journal.pone.0085294), 2014-01-08
Supplement: pone.0085294.s004.pdf [file pone.0085294.s004.pdf]

|         | SPR | BRAF  | PTEN gene      | PTEN protein | N-ras | c-Kit | CDK4 | Age | Gender | Stage        | Site            | Pathology    | Ref.    |
|---------|-----|-------|----------------|--------------|-------|-------|------|-----|--------|--------------|-----------------|--------------|---------|
| WM35    | +   | V600E | Hem Del        | +            | WT    | WT    | WT   | 24  | F      | Stage 1      | Scalp/neck      | SSM, RGP/VGP | 1, 2, 3 |
| WM1341D | +   | V600R | WT             | +            | WT    | WT    | WT   | 85  | M      | na           | na              | LMM, RGP/VGP | 1, 2    |
| WM1366  | +   | WT    | WT             | +            | Q61L  | WT    | WT   | 79  | M      | na           | na              | VGP          | 1, 2    |
| WM278   | -   | V600E | Hem Del        | +            | WT    | WT    | WT   | 62  | F      | Stage 2      | na              | NM, VGP only | 1, 2, 4 |
| WM1158  | -   | V600E | Hem Del        | -            | WT    | WT    | WT   | 32  | M      | Stage 2, met | Abdomen         | SSM, RGP/VGP | 1, 2, 5 |
| WM2664  | -   | V600D | Hom Del        | -            | WT    | WT    | WT   | 58  | F      | na           | Thigh skin      | na           | 1, 2, 3 |
| WM793B  | -   | V600E | Hem Del, W274X | -            | WT    | WT    | K22Q | 37  | M      | Stage 1      | Sternum         | SSM, RGP/VGP | 1, 2, 3 |
| WM983B  | -   | V600E | WT             | +            | WT    | WT    | WT   | na  | M      | na           | Lymph node, Met | na           | 1, 2    |
| WM3248  | -   | V600E | K144X          | -            | WT    | na    | na   | 68  | M      | na           | na              | VGP          | 1, 2    |
| WM3211  | -   | WT    | na             | na           | WT    | na    | na   | 74  | M      | Stage 1      | Ankle           | RGP/VGP      | 1, 2    |
| WM1361A | -   | V600E | na             | na           | mut   | na    | na   | 50  | M      | Stage 4      | Forearm         | SSM, RGP/VGP | 1, 2    |
| WM902B  | -   | V600E | na             | na           | WT    | na    | na   | na  | F      | na           | na              | SSM, VGP     | 1, 2    |
| WM1617  | -   | V600E | na             | na           | na    | na    | na   | 62  | F      | na           | Lymph node, Met | na           | 1, 2    |
| WM3734  | -   | na    | na             | na           | na    | na    | na   | na  | na     | na           | Brain           | na           | 2       |

SPR-proficient and -deficient lines are highlighted in blue and yellow, respectively. Abbreviations: WT, wild-type; Hem Del, hemizygous deletion; Hom Del, homozygous deletion; M, male; F, female; SSM, superficial spreading melanoma; RGP, radial growth phase; VGP, vertical growth phase; NM, nodular melanoma; LMM, lentigo malignant melanoma; Met, metastatic; na, not available.

#### Supplementary references:

1. The Wistar Institute, <http://www.wistar.org/lab/meenhard-herlyn-dvm-dsc/page/melanoma-cell-lines-0>

2. Coriell Institute, <http://ccr.coriell.org/Sections/Collections/WISTAR/CellLines.aspx?PgId=572&coll=WC>

3. Paraiso KH, Xiang Y, Rebecca VW, Abel EV, Chen YA *et al.* (2011) PTEN loss confers BRAF inhibitor resistance to melanoma cells through the suppression of BIM expression. *Cancer Res* 71: 2750-60.

4. Spofford LS, Abel EV, Boisvert-Adamo K, Aplin AE (2006) Cyclin D3 expression in melanoma cells is regulated by adhesion-dependent phosphatidylinositol 3-kinase signaling and contributes to G1-S progression. *J Biol Chem* 281: 25644-51.

5. Alfano RW, Leppla SH, Liu S, Bugge TH, Herlyn M *et al.* (2008) Cytotoxicity of the matrix metalloproteinase-activated anthrax lethal toxin is dependent on gelatinase expression and B-RAF status in human melanoma cells. *Mol Cancer Ther* 7: 1218-26.
